# Supplementary material
Source: ML conference proceedings conference paper supplement (https://proceedings.neurips.cc/paper_files/paper/2022/hash/6b7f9d9c1217a748391800871ff7d17d-Abstract.html)
Supplement: Supplementary file 1 [file 6b7f9d9c1217a748391800871ff7d17d-Supplemental-Conference.zip]

Archive with 2 entries (2 files):
- CameraReadyCheckList.pdf
- CameraReadyAppendix.pdf
